# Supplementary material
Source: bioRxiv or medRxiv preprint supplement (http://biorxiv.org/highwire/filestream/67935/field_highwire_adjunct_files/1/097683-2.pdf)
Supplement: Supplementary file [file 097683-2.pdf]

## S2 File - Fitting the ABM describing division rate evolution to the HeLa data

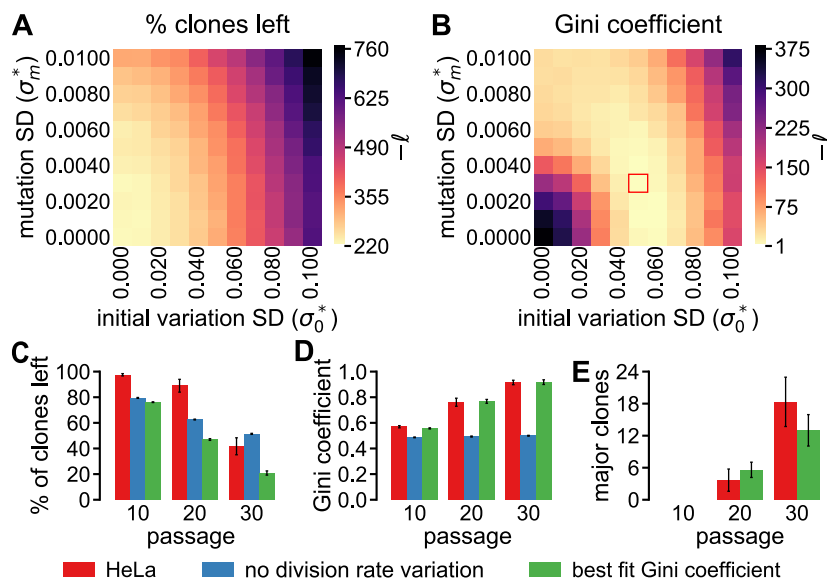

**Figure 1: ABM simulations match clonal dominance development for the HeLa cell line.** **A-B** Maximum Likelihood estimator ( $\ell$ ) for a range of initial division rate SDs ( $\sigma_0^*$ ) and mutation SDs ( $\sigma_m^*$ ), for either clone loss (**A**) or Gini coefficient (**B**). **C-E** Comparison of clone loss (**C**), clonal dominance (**D**) and number of major clones (**E**) for the *in vitro* experiments with HeLa cells, simulations without division rate variation, and simulations with the parameter set highlighted in **B**. All simulation results are the mean of 10 runs and the results for the HeLa cells are the mean of 3 replicates, with the error bars representing the SD.

We tested whether our model can also reproduce the clone size dynamics observed during *in vitro* growth and passage with HeLa cells. To this purpose, we ran a parameter sweep with each simulation initialized based on the initial clone size distribution for HeLa cells and performed an MLE with either clone loss (Fig 1A) or the Gini coefficient (Fig 1B). As with the monoclonal K562 cell line, no good match could be found when fitting to the clone loss data, but multiple parameter sets closely match the experimentally observed Gini coefficient data. Similarly, the best-fitting parameter set for the Gini coefficient results in an overestimation of clone loss (Fig 1C) while the Gini coefficient closely matches the *in vitro* observations (Fig 1D) as do the number of major clones (Fig 1E). The parameter set that produces the best fit for clone loss is  $\sigma_0^* = \sigma_m^* = 0$ , which corresponds to a model in which all cells divide at the same rate. However, this model still poorly matches clone loss and does not induce any clonal dominance (Fig 1C-D). Given our results on the effect of spurious reads to the data, it seems likely that these explain at least a part of the mismatch with respect to clone loss.
